# Supplementary material for: Simultaneous high-efficiency base editing and reprogramming of patient fibroblasts
Source: PubMed Central journal article supplement (PMC8693657; doi:10.1016/j.stemcr.2021.10.017), 2021-11-24
Supplement: mmc1.pdf [file mmc1.pdf]

**Stem Cell Reports, Volume 16**

**Supplemental Information**

**Simultaneous high-efficiency base editing and reprogramming of patient fibroblasts**

**Sami Jalil, Timo Keskinen, Rocío Maldonado, Joonas Sokka, Ras Trokovic, Timo Otonkoski, and Kirmo Wartiovaara**

**Figure S1: Direct adenine base editing in patient-derived hiPSC and supplemental immunofluorescence staining image**

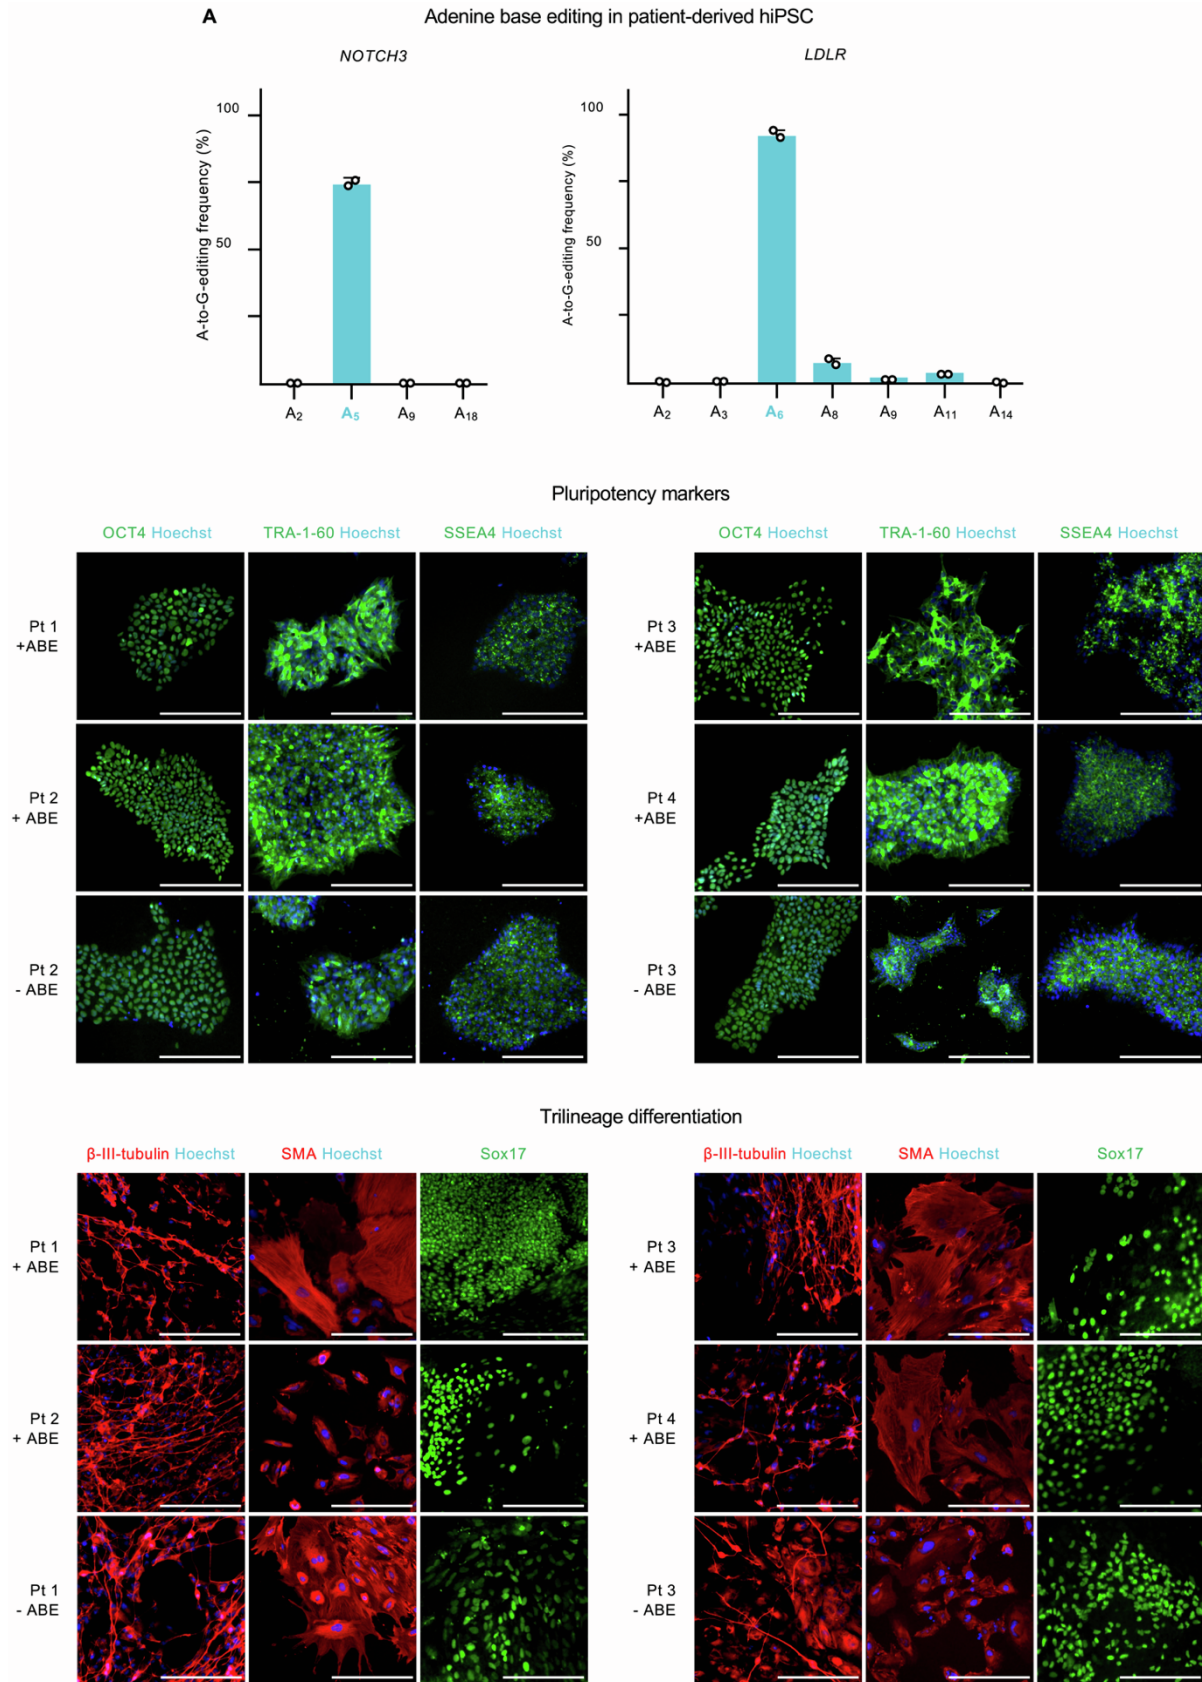

(A) One non-ABE hiPSC line per patient (two for NOTCH3 and two for LDLR) were electroporated with the ABEmax RNA construct and the corresponding sgRNA. After seven days, each hiPSC bulk population was sequenced. The bar graphs depict the average editing efficiency on each adenine in the loci. Data are represented as mean + standard deviation.

(B) Immunofluorescence staining for pluripotency markers OCT4, TRA-1-60, and SSEA4 of the remaining four clones base-edited at the targeted adenine (+ ABE) and their non-ABE controls (- ABE) not shown in Figure 2C.

(C) Immunofluorescence staining of embryoid bodies derived from the remaining clones base-edited at the targeted adenine (+ ABE) and their non-ABE controls (- ABE) not shown in Figure 2D.  $\beta$ -III-tubulin (ectoderm), smooth muscle actin (SMA) (mesoderm), and Sox17 (endoderm). NOTCH3: patient 1 and patient 2. LDLR: patient 3 and patient 4. Hoechst, in blue, is a nuclear marker. The white bar represents 200 $\mu$ m.

**Table S1: Single guide RNA and primers employed in this study**

| Name                                         | Sequence                                                                                                                                                                                  | Function                                                                             | Comments  | Vendor |
|----------------------------------------------|-------------------------------------------------------------------------------------------------------------------------------------------------------------------------------------------|--------------------------------------------------------------------------------------|-----------|--------|
| <b>Single guide RNA</b>                      |                                                                                                                                                                                           |                                                                                      |           |        |
| sg_NOTCH3                                    | <u>mC*mA*mG*rCrArGrCrArCrCrGrUrGrGrCrArCrArGrUrUrUrArGrArGrCrUrArArArArUrArGrCrArArGrUrUrArArGrCrUrArGrUrCrCrGrUrUrArCrArCrUrUrGrArArArArGrUrGrCrArCrCrGrArGrUrCrGrUrGrCmU*mU*mU*rU</u>   | Target the c.475C>T mutation in NOTCH3.                                              | RNA oligo | IDT    |
| sg_LDLR                                      | <u>mC*mA*mA*rCrArGrArGrArCrArCrArUrCrUrUrGrUrUrUrArGrArGrCrUrArArArArUrArGrCrArArGrUrUrArArArArGrCrUrArGrUrCrCrGrUrUrArCrArCrUrUrGrArArArArGrUrGrCrArCrCrGrArGrUrCrGrUrGrCmU*mU*mU*rU</u> | Target the c.1784G>A mutation in LDLR                                                | RNA oligo | IDT    |
| sg_gRNA2                                     | <u>mC*mT*mT*rGrArCrArArTArGrCrTrTtGrArCrArGrUrUrUrUrArGrArGrCrUrArArArArUrArGrCrArArGrUrUrArGrCrUrArGrUrCrCrGrUrUrArCrArCrUrUrGrArArArArGrUrGrCrArCrCrGrArGrUrCrGrUrGrCmU*mU*mU*rU</u>    | Target the gRNA locus in chromosome 11                                               | RNA oligo | IDT    |
| sg_Site 16                                   | <u>mG*mG*mG*rArArTrArArTrCrArTrArGrArArTrCrGrUrUrUrUrArGrArGrCrUrArArArArUrArGrCrArArGrUrUrArGrCrUrArGrUrCrCrGrUrUrArCrArCrUrUrGrArArArArGrUrGrCrArCrCrGrArGrUrCrGrUrGrCmU*mU*mU*rU</u>   | Target the site 16 locus in chromosome 1                                             | RNA oligo | IDT    |
| <b>PCR primers</b>                           |                                                                                                                                                                                           |                                                                                      |           |        |
| NOTCH3 FW                                    | TCCTTTGTCTCTGGGCCATC                                                                                                                                                                      | Amplify the region containing the pathogenic mutation                                | DNA oligo | Sigma  |
| NOTCH3 RV                                    | GACAGTCGTCCACGTTCACT                                                                                                                                                                      | Amplify the region containing the pathogenic mutation                                | DNA oligo | Sigma  |
| 1 <sup>st</sup> IDT off-target NOTCH3 FW     | ACTTCTCAGCCCAAGGATGC                                                                                                                                                                      | Amplify the region containing a possible off-target                                  | DNA oligo | Sigma  |
| 1 <sup>st</sup> IDT off-target NOTCH3 RV     | CGCTCCAGTCTTTCTGCCTA                                                                                                                                                                      | Amplify the region containing a possible off-target                                  | DNA oligo | Sigma  |
| 2 <sup>nd</sup> IDT off-target NOTCH3 FW     | GTITTCGAGCCATGGGGTTA                                                                                                                                                                      | Amplify the region containing a possible off-target                                  | DNA oligo | Sigma  |
| 2 <sup>nd</sup> IDT off-target NOTCH3 RV     | TTGGGAGCAATCCCGCTTAG                                                                                                                                                                      | Amplify the region containing a possible off-target                                  | DNA oligo | Sigma  |
| 3 <sup>rd</sup> IDT off-target NOTCH3 FW     | AGTCGCGTITCTCCGATCTC                                                                                                                                                                      | Amplify the region containing a possible off-target                                  | DNA oligo | Sigma  |
| 3 <sup>rd</sup> IDT off-target NOTCH3 RV     | GAGGATGGCAGTGAGGACAC                                                                                                                                                                      | Amplify the region containing a possible off-target                                  | DNA oligo | Sigma  |
| 1 <sup>st</sup> CRISPOR off-target NOTCH3 FW | GCAGATGGTCAGTGATCCCA                                                                                                                                                                      | Amplify the region containing a possible off-target                                  | DNA oligo | Sigma  |
| 1 <sup>st</sup> CRISPOR off-target NOTCH3 RV | ACAGCAAAAATGTCCTGCGC                                                                                                                                                                      | Amplify the region containing a possible off-target                                  | DNA oligo | Sigma  |
| 2 <sup>nd</sup> CRISPOR off-target NOTCH3 FW | AGAGTGTCTCTCGGGT                                                                                                                                                                          | Amplify the region containing a possible off-target                                  | DNA oligo | Sigma  |
| 2 <sup>nd</sup> CRISPOR off-target NOTCH3 RV | TCAGGCCATCCCTCAATGTC                                                                                                                                                                      | Amplify the region containing a possible off-target                                  | DNA oligo | Sigma  |
| 3 <sup>rd</sup> CRISPOR off-target NOTCH3 FW | GTITTAGTGCCCTCCAGGTA                                                                                                                                                                      | Amplify the region containing a possible off-target                                  | DNA oligo | Sigma  |
| 3 <sup>rd</sup> CRISPOR off-target NOTCH3 RV | AGGCCAGAGGCTGTATGAGC                                                                                                                                                                      | Amplify the region containing a possible off-target                                  | DNA oligo | Sigma  |
| LDLR FW                                      | CATTGGAGAGGGCGTACACG                                                                                                                                                                      | Amplify the region containing the pathogenic mutation                                | DNA oligo | Sigma  |
| LDLR RV                                      | GTCACAACCAGTTTTCTGCCT                                                                                                                                                                     | Amplify the region containing the pathogenic mutation                                | DNA oligo | Sigma  |
| 1 <sup>st</sup> IDT off-target LDLR FW       | ATCCACACCAAAGCCAAAAC                                                                                                                                                                      | Amplify the region containing a possible off-target                                  | DNA oligo | Sigma  |
| 1 <sup>st</sup> IDT off-target LDLR RV       | ACAGTAGTCTTTGTGCTCCA                                                                                                                                                                      | Amplify the region containing a possible off-target                                  | DNA oligo | Sigma  |
| 2 <sup>nd</sup> IDT off-target LDLR FW       | AGTACCACCCCTGCCTTTA                                                                                                                                                                       | Amplify the region containing a possible off-target                                  | DNA oligo | Sigma  |
| 2 <sup>nd</sup> IDT off-target LDLR RV       | GACCCGTAGGCATGACTTTCA                                                                                                                                                                     | Amplify the region containing a possible off-target                                  | DNA oligo | Sigma  |
| 1 <sup>st</sup> CRISPOR off-target LDLR FW   | CACCTACGCATTCACACGC                                                                                                                                                                       | Amplify the region containing a possible off-target                                  | DNA oligo | Sigma  |
| 1 <sup>st</sup> CRISPOR off-target LDLR RV   | GTATCTGGCAGAGGTAGGAC                                                                                                                                                                      | Amplify the region containing a possible off-target                                  | DNA oligo | Sigma  |
| 2 <sup>nd</sup> CRISPOR off-target LDLR FW   | CCCTCTCTTGAAGAGTTAGCCT                                                                                                                                                                    | Amplify the region containing a possible off-target                                  | DNA oligo | Sigma  |
| 2 <sup>nd</sup> CRISPOR off-target LDLR RV   | TTGTCTAGGGAAGCCCATGTC                                                                                                                                                                     | Amplify the region containing a possible off-target                                  | DNA oligo | Sigma  |
| gRNA FW                                      | GACGTGTCCCATCAAAAATCCT                                                                                                                                                                    | Amplify the locus Chr11: -5254881                                                    | DNA oligo | Sigma  |
| gRNA RV                                      | TTCCAGGGTTTCTCCTCCA                                                                                                                                                                       | Amplify the locus Chr11: -5254881                                                    | DNA oligo | Sigma  |
| Site16 FW                                    | CAGGAGTAGGGGTGAGGGAA                                                                                                                                                                      | Amplify the locus Chr1: -179826685                                                   | DNA oligo | Sigma  |
| Site16 RV                                    | ATCTGGTTCTTCAGCTGGC                                                                                                                                                                       | Amplify the locus Chr1: -179826685                                                   | DNA oligo | Sigma  |
| ABEmax_ORF+XmaI_FW                           | CGCGGGCCCCGGATCCACAGCCACCATGAAACGGACAGCCGACGGAA                                                                                                                                           | Amplify the ABEmax ORF and add an XmaI restriction site before the start codon       | DNA oligo | Sigma  |
| ABEmax_ORF+NotI_RV                           | ATCCGCGGCGGCTCACCTACTTAGACTTTCTCTTCTTCTGGGC                                                                                                                                               | Amplify the ABEmax ORF and add a NotI restriction site after the stop codon          | DNA oligo | Sigma  |
| BE3/BE4_ORF+BamHI_FW                         | CGCGGGCCCCGGATCCACAGCCACCATGAGCTCAGAGACTGGCCAG                                                                                                                                            | Amplify the BE3 and BE4 ORF, and add a BamHI restriction site before the start codon | DNA oligo | Sigma  |
| BE3/BE4_ORF+NotI_RV                          | ATCCGCGGCGGCTCACCTACTTAGACTTTCTCTTCTTCTGGGA                                                                                                                                               | Amplify the BE3 and BE4 ORF, and add a NotI restriction site after the stop codon    | DNA oligo | Sigma  |
| EBNA-1_FW                                    | ATCGTCAAAGCTGCACACAG                                                                                                                                                                      | Detect the EBNA-1 region from the reprogramming vectors in hiPSC                     | DNA oligo | Sigma  |
| EBNA-1_RV                                    | CCCAGAGTCCCAGTAGTCA                                                                                                                                                                       | Detect the EBNA-1 region from the reprogramming vectors in hiPSC                     | DNA oligo | Sigma  |
| OriP_FW                                      | TTCCACGAGGGTAGTGAACC                                                                                                                                                                      | Detect the OriP region from the reprogramming vectors in hiPSC                       | DNA oligo | Sigma  |
| OriP_RV                                      | TCGGGGGTGTTAGAGACAAC                                                                                                                                                                      | Detect the OriP region from the reprogramming vectors in hiPSC                       | DNA oligo | Sigma  |
| <b>qPCR primers</b>                          |                                                                                                                                                                                           |                                                                                      |           |        |
| qPCR_OCT4_FW                                 | TTGGGCTCAGAGAAGGATGTG                                                                                                                                                                     | qPCR analysis of OCT4 expression                                                     | DNA oligo | Sigma  |
| qPCR_OCT4_RV                                 | GTGAAGTAGGGCTCCCAT                                                                                                                                                                        | qPCR analysis of OCT4 expression                                                     | DNA oligo | Sigma  |
| qPCR_SOX2_FW                                 | GCCCTGCAGTACAATCCAT                                                                                                                                                                       | qPCR analysis of SOX2 expression                                                     | DNA oligo | Sigma  |
| qPCR_SOX2_RV                                 | TGCCCTGCTGCGAGTAGGA                                                                                                                                                                       | qPCR analysis of SOX2 expression                                                     | DNA oligo | Sigma  |
| qPCR_L1TD1_FW                                | TCAGAGATGACAGCATTTGGC                                                                                                                                                                     | qPCR analysis of L1TD1 expression                                                    | DNA oligo | Sigma  |
| qPCR_L1TD1_RV                                | TTACGGCAGCAGGTTCTGTTTA                                                                                                                                                                    | qPCR analysis of L1TD1 expression                                                    | DNA oligo | Sigma  |
| qPCR_LIN28_FW                                | AGGAGACAGGTGCTACAATCG                                                                                                                                                                     | qPCR analysis of LIN28 expression                                                    | DNA oligo | Sigma  |
| qPCR_LIN28_RV                                | TCTTGGGCTGGGGTGGCAG                                                                                                                                                                       | qPCR analysis of LIN28 expression                                                    | DNA oligo | Sigma  |
| qPCR_KLF4_FW                                 | CGCTCCATTACCAAG                                                                                                                                                                           | qPCR analysis of KLF4 expression                                                     | DNA oligo | Sigma  |
| qPCR_KLF4_RV                                 | CACGATCGTCTCCCTCTT                                                                                                                                                                        | qPCR analysis of KLF4 expression                                                     | DNA oligo | Sigma  |
| qPCR_TGDF1_FW                                | TCAGAGATGACAGCATTTGGC                                                                                                                                                                     | qPCR analysis of TGDF1 expression                                                    | DNA oligo | Sigma  |
| qPCR_TGDF1_RV                                | TTACGGCAGCAGGTTCTGTTTA                                                                                                                                                                    | qPCR analysis of TGDF1 expression                                                    | DNA oligo | Sigma  |
| qPCR_NANOG_FW                                | CTCAGCCTCCAGCAGATCG                                                                                                                                                                       | qPCR analysis of NANOG expression                                                    | DNA oligo | Sigma  |
| qPCR_NANOG_RV                                | TAGATTCATTCTCTGTTCTGG                                                                                                                                                                     | qPCR analysis of NANOG expression                                                    | DNA oligo | Sigma  |
| qPCR_CycloG_FW                               | TCTTGTCAATGGCCAACAGAG                                                                                                                                                                     | qPCR analysis of CycloG expression as a reference housekeeping gene                  | DNA oligo | Sigma  |
| qPCR_CycloG_RV                               | GCCCATCTAAATGAGGAGTTG                                                                                                                                                                     | qPCR analysis of CycloG expression as a reference housekeeping gene                  | DNA oligo | Sigma  |

The table S1 shows the single-guide RNAs (sgRNA) employed to correct the NOTCH3 and LDLR pathogenic point mutations; the sgRNA targeting the loci gRNA2 and Site 16; and the primers that served for amplifying on-target and off-target sequences, plasmid cloning, and qPCR.

The sequences are notated in 5'-to-3' orientation. In the "single guide RNA section", the protospacer is underlined, the non-underlined sequence is the canonical CRISPR-Cas9 tracrRNA. "r\_" (rA, rC, rG, rU) refers to ribonucleic bases. "m\_\*" (mC\*, mA\*, mG\*, mU\*) refers to phosphorothioated 2'-O-methyl RNA bases.
